# Supplementary material for: Resistance to anti-HER2 therapy associated with the TSC2 nonsynonymous variant c.4349 C > G (p.Pro1450Arg) is reversed by CDK4/6 inhibitor in HER2-positive breast cancer
Source: PubMed Central journal article supplement (PMC10170158; doi:10.1038/s41523-023-00542-1), 2023-05-09

**Supplementary Table 1. List of 98 inherited cancer genes**

| <b>Cancer</b>         | <b>Gene</b>                                                                                                                                                                                                                                                                                                                                |
|-----------------------|--------------------------------------------------------------------------------------------------------------------------------------------------------------------------------------------------------------------------------------------------------------------------------------------------------------------------------------------|
| Breast cancer         | <i>ATM, BARD1, BLM, BRCA1, BRCA2, CDH1, CHEK2, FANCC, FANCM, MCPH1, MEN1, MLH1, MRE11a, MSH2, MSH6, MUTYH, NBN, NF1, PALB2, PMS2, PTEN, RAD50, RAD51C, RAD51D, STK11, TP53, XRCC2</i>                                                                                                                                                      |
| Ovarian cancer        | <i>BARD1, BRCA1, BRCA2, BRIP1, CASR, EPCAM, FAMI75A, MLH1, MRE11A, MSH2, MSH6, NBN, PALB2, PMS2, RAD50, RAD51C, RAD51D, STK11</i>                                                                                                                                                                                                          |
| Lung cancer           | <i>BAP1, EGFR</i>                                                                                                                                                                                                                                                                                                                          |
| Stomach cancer        | <i>BLM, CDH1, EPCAM, KIT, MLH1, MSH2, MSH6, PDGFRA, PMS2, SDHA, STK11</i>                                                                                                                                                                                                                                                                  |
| Liver cancer          | <i>GPC3</i>                                                                                                                                                                                                                                                                                                                                |
| Esophageal carcinoma  | <i>APC, MLH1</i>                                                                                                                                                                                                                                                                                                                           |
| Colo-Rectal Carcinoma | <i>AXIN2, APC, BLM, BMPRIA, CASR, CDH1, CHEK2, GREM1, KIT, MLH1, MSH2, MSH6, MUTYH, PDGFRA, PMS1, PMS2, PTEN, SDHA, SMAD4, POLD1, POLE, STK11</i>                                                                                                                                                                                          |
| Prostate cancer       | <i>BRCA1, BRCA2, CHEK2, HOXB13, NBN</i>                                                                                                                                                                                                                                                                                                    |
| Bladder Cancer        | <i>HRAS</i>                                                                                                                                                                                                                                                                                                                                |
| Pancreatic cancer     | <i>ATM, BRCA1, BRCA2, CDKN2A, EPCAM, MLH1, MSH2, MSH6, PALB2, PMS2, STK11</i>                                                                                                                                                                                                                                                              |
| Lymphoma              | <i>ATM, BLM, NBN, PAX5, PRF1</i>                                                                                                                                                                                                                                                                                                           |
| Cerebroma             | <i>BAP1, MLH1, MSH2, MSH6, NF2, PMS2, SMARCE1</i>                                                                                                                                                                                                                                                                                          |
| Thyroid Carcinoma     | <i>CDC73, MEN1, PRKARIA, PTEN, RET, WRN</i>                                                                                                                                                                                                                                                                                                |
| Cervical cancer       | <i>STK11</i>                                                                                                                                                                                                                                                                                                                               |
| Endometrium carcinoma | <i>EPCAM, MLH1, MSH2, MSH6, PMS2, PTEN</i>                                                                                                                                                                                                                                                                                                 |
| Others                | <i>AIP, ALK, CDK4, CDKN1B, CDKN1C, CEBPA, DICER1, DIS3L2, FANCA, FANCB, FANCD2, FANCE, FANCF, FANCG/XRCC9, FANCI, FANCL, FANCP/SLX4, FANCQ/ERCC4, FANCR/RAD51, FANCT/UBE2T, FH, FLCN, GATA2, MAX, MET, PHOX2B, PTCH1, RB1, RECQL, RECQL4, RUNX1, SMARCA4, SDHAF2, SDHB, SDHC, SDHD, SMARCB1, SUFU, TMEM127, TERC, TSC1, TSC2, VHL, WT1</i> |

**Supplementary Table 2. Somatic alternations identified in the breast cancer patient with *TSC2* c.4349C>G germline variant**

| Chr  | Gene    | AA Change                                                                                                                                                     | Function                | SIFT     | Polyphen-2           |
|------|---------|---------------------------------------------------------------------------------------------------------------------------------------------------------------|-------------------------|----------|----------------------|
| chr1 | UBR4    | NM_020765:exon59:c.8609_8610insGTGCAGT<br>GGACTCAGTGGCTGG:p.D2870Efs*26                                                                                       | frameshift<br>insertion | .        | .                    |
| chr1 | FAF1    | NM_007051:exon10:c.884_885insTTTGGCATG<br>GCGTCAT:p.F296Lfs*7                                                                                                 | frameshift<br>insertion | .        | .                    |
| chr1 | KRTCAP2 | NM_173852:exon3:c.238delG:p.A80Pfs*94                                                                                                                         | frameshift<br>deletion  | .        | .                    |
| chr1 | OR10K1  | NM_001004473:exon1:c.553_554insTTACCCC<br>ATTGTTCAATCCAATGATTTATAGTCTGA<br>GAAATAAGGAATTCAAATCAGCCCTACG<br>AAGAACAATCGGCCAAACTTTCTATCCTC<br>TTAG:p.K186Tfs*33 | frameshift<br>insertion | .        | .                    |
| chr1 | IGFN1   | NM_001164586:exon12:c.3769_3823del:p.G125<br>8Vfs*35                                                                                                          | frameshift<br>deletion  | .        | .                    |
| chr2 | RANBP2  | NM_006267:exon20:c.G7083C:p.Q2361H                                                                                                                            | nonsynonymous<br>SNV    | Damaging | Possibly<br>damaging |
| chr2 | NEB     | NM_004543:exon72:c.10472_10473insTTTTTT<br>TTTCTTGCCTTTTA:p.D3492_I6657delinsFF<br>FFAF*                                                                      | stopgain                | .        | .                    |
| chr2 | COQ10B  | NM_001320818:exon4:c.452_453insCTTCTTT<br>CCTTCTTCTTTCTCTCTCTC:p.D152Ffs*14                                                                                   | frameshift<br>insertion | .        | .                    |
| chr3 | CD200   | NM_001318828:exon3:c.302_303insAGTACAG<br>CCCATAGTATCCCTTCACTACAAAT:p.R102<br>Vfs*20                                                                          | frameshift<br>insertion | .        | .                    |
| chr3 | ACTL6A  | NM_004301:exon13:c.1180_1184del:p.I395Rfs*<br>21                                                                                                              | frameshift<br>deletion  | .        | .                    |
| chr4 | THEGL   | NM_001256475:exon8:c.1135_1136insCTAGCC<br>CCAGAACCCAGCCTTTCCTGTCCCCTTT<br>AGCCTGAAATTGACATACCTCTTATTTGG<br>ATTAG:p.I384Pfs*8                                 | frameshift<br>insertion | .        | .                    |
| chr4 | UGT2B28 | NM_001207004:exon1:c.191_192insCAAGTCA<br>CTG:p.D65Kfs*4                                                                                                      | frameshift<br>insertion | .        | .                    |
| chr4 | HELQ    | NM_001297755:exon2:c.818_819insACTGAGA<br>TTCTAATTTTTGA:p.M273Ifs*5                                                                                           | frameshift<br>insertion | .        | .                    |
| chr4 | ENPEP   | NM_001977:exon14:c.G2076A:p.W692X                                                                                                                             | stopgain                | .        | .                    |
| chr7 | ZNF680  | NM_178558:exon4:c.337_338insTGTGTGTGT<br>GTGTGTGTGTAGAGAGAGAGA:p.G113Vfs<br>*16                                                                               | frameshift<br>insertion | .        | .                    |
| chr7 | SLC13A4 | NM_001318192:exon13:c.1391_1392insTT:p.W<br>465Sfs*34                                                                                                         | frameshift<br>insertion | .        | .                    |
| chr7 | SLC13A4 | NM_001318192:exon13:c.1390_1391insTCTGG<br>:p.P464Lfs*36                                                                                                      | frameshift<br>insertion | .        | .                    |

|       |           |                                                                                            |                         |          |                      |
|-------|-----------|--------------------------------------------------------------------------------------------|-------------------------|----------|----------------------|
| chr7  | KMT2C     | NM_170606:exon8:c.C1173A:p.C391X                                                           | stopgain                | .        | .                    |
| chr8  | POP1      | NM_001145860:exon6:c.760_761insCCTGTGT<br>AAATTCCTA:p.E254Afs*6                            | frameshift<br>insertion | .        | .                    |
| chr8  | SYBU      | NM_001330596:exon5:c.G533C:p.R178P                                                         | nonsynonymous<br>SNV    | Damaging | Probably<br>damaging |
| chr9  | SPATA31D1 | NM_001001670:exon4:c.405_421del:p.D139Vfs<br>*23                                           | frameshift<br>deletion  | .        | .                    |
| chr9  | TTC16     | NM_001317037:exon6:c.492_493insCTTCCGT<br>TACCGATGGTGA:p.A165Lfs*323                       | frameshift<br>insertion | .        | .                    |
| chr10 | MKI67     | NM_001145966:exon12:c.1932_1933insCGTTC<br>TG:p.M645Rfs*67                                 | frameshift<br>insertion | .        | .                    |
| chr11 | PPP6R3    | NM_001164163:exon17:c.C1822T:p.R608X                                                       | stopgain                | .        | .                    |
| chr11 | ATM       | NM_000051:exon23:c.3307_3308insACATAAT<br>AAC:p.S1104Ifs*21                                | frameshift<br>insertion | .        | .                    |
| chr12 | NUP107    | NM_001330192:exon23:c.G1919A:p.R640H                                                       | nonsynonymous<br>SNV    | Damaging | Probably<br>damaging |
| chr12 | CCT2      | NM_001198842:exon7:c.465_508del:p.I155Mfs*<br>6                                            | frameshift<br>deletion  | .        | .                    |
| chr16 | TSC2      | NM_000548:exon34:c.C4349G:p.P1450R                                                         | nonsynonymous<br>SNV    | Damaging | Probably<br>damaging |
| chr16 | RRN3      | NM_001301064:exon15:c.1469_1470insAAAA<br>AAAAAAAAATCCACCTCCT:p.Y490*                      | frameshift<br>insertion | .        | .                    |
| chr16 | REXO5     | NM_001144924:exon3:c.C145T:p.R49C                                                          | nonsynonymous<br>SNV    | Damaging | Probably<br>damaging |
| chr17 | STARD3    | NM_001165938:exon12:c.1037_1038insTCTTC<br>TGCACTTTGGCCTTGGGTCATTGTCCCCT:p<br>.I347Lfs*43  | frameshift<br>insertion | .        | .                    |
| chr17 | IKZF3     | NM_001257408:exon4:c.362_477del:p.F121*                                                    | frameshift<br>deletion  | .        | .                    |
| chr17 | WIPF2     | NM_133264:exon5:c.911_912insTGGG:p.S305<br>Gfs*6                                           | frameshift<br>insertion | .        | .                    |
| chr19 | RYR1      | NM_000540:exon38:c.6180_6181insAACACAA<br>GGAAACCTCATTTCTACAAAAAATACAAA<br>A:p.S2061Nfs*33 | frameshift<br>insertion | .        | .                    |
| chr19 | PSG2      | NM_031246:exon4:c.C856G:p.L286V                                                            | nonsynonymous<br>SNV    | Damaging | Probably<br>damaging |
| chr19 | KLK6      | NM_001012965:exon5:c.347_351del:p.K116Rfs<br>*60                                           | frameshift<br>deletion  | .        | .                    |
| chr20 | ATRN      | NM_001207047:exon12:c.1572_1635del:p.T528<br>Gfs*25                                        | frameshift<br>deletion  | .        | .                    |
| chr20 | MYT1      | NM_004535:exon7:c.G1096A:p.E366K                                                           | nonsynonymous<br>SNV    | Damaging | Probably<br>damaging |
| chr21 | KRTAP13-1 | NM_181599:exon1:c.90_91insAACTGCTGCTC<br>TGGAAACTTCT:p.P31Nfs*16                           | frameshift<br>insertion | .        | .                    |

|      |       |                                                                     |                         |          |                      |
|------|-------|---------------------------------------------------------------------|-------------------------|----------|----------------------|
| chrX | NHS   | NM_001291868:exon6:c.2730_2731insAGTAA<br>AGA:p.H911Sfs*14          | frameshift<br>insertion | .        | .                    |
| chrX | NHS   | NM_001291868:exon6:c.2731_2732insCTTGAA<br>CTTCCAATT:p.H911delinsP* | stopgain                |          |                      |
| chrX | SSX5  | NM_021015:exon2:c.9_10insTAGTAGTGGCC<br>CAGGG:p.D4*                 | frameshift<br>insertion | .        | .                    |
| chrX | NLGN3 | NM_001166660:exon2:c.C359T:p.P120L                                  | nonsynonymous<br>SNV    | Damaging | Probably<br>damaging |

chr, chromosome; AA, amino acid; SNV, single nucleotide polymorphism

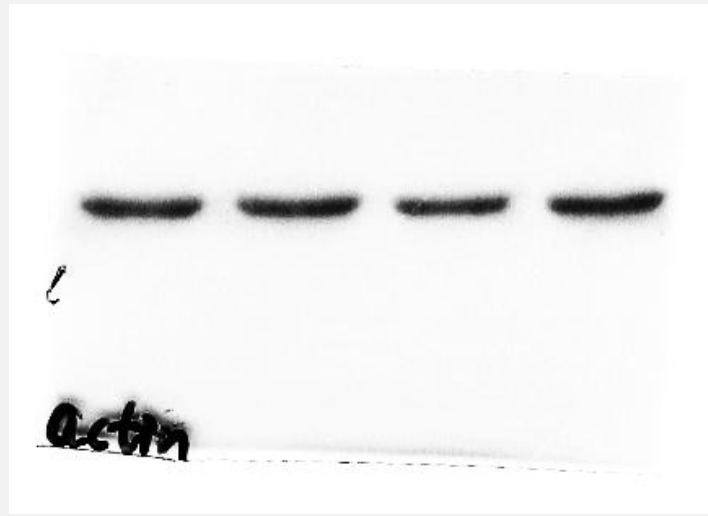

Actin

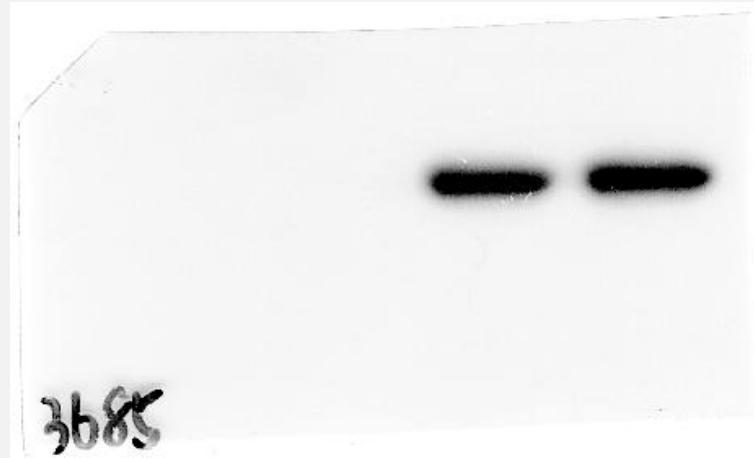

Flag

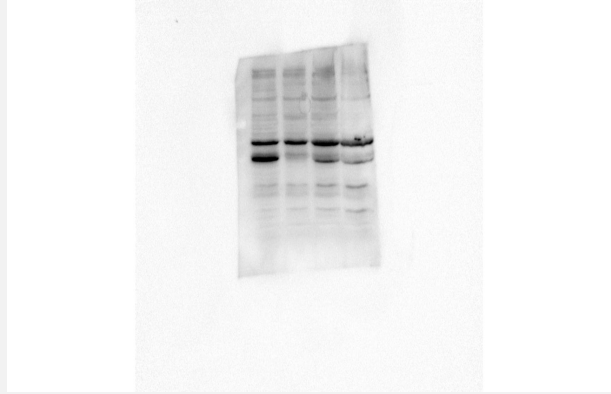

EGFR

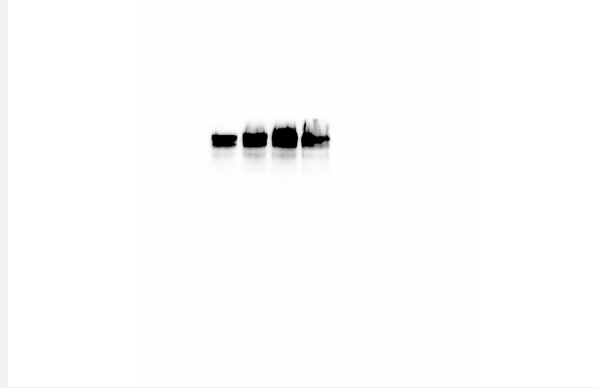

HER2

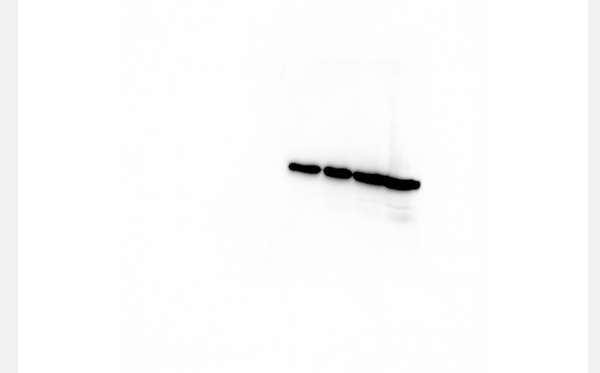

GAPDH

HER2

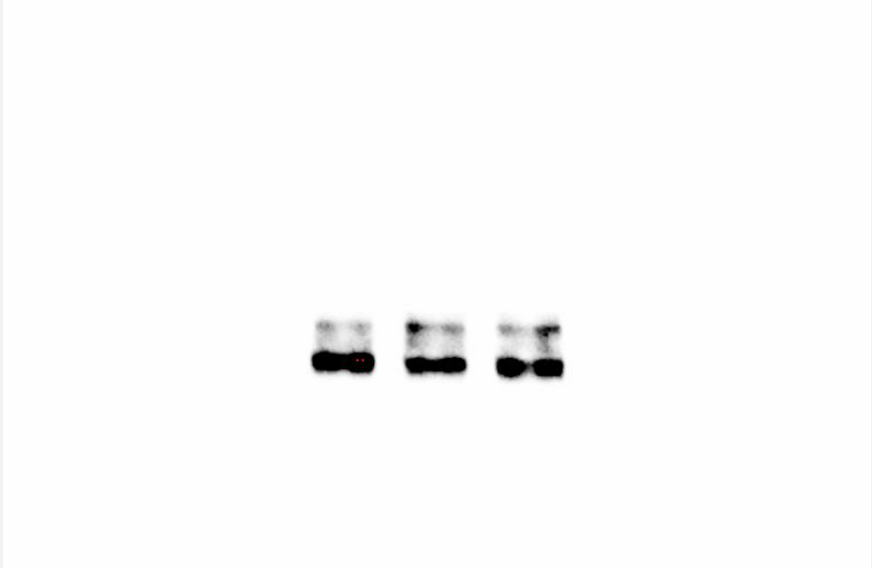

control

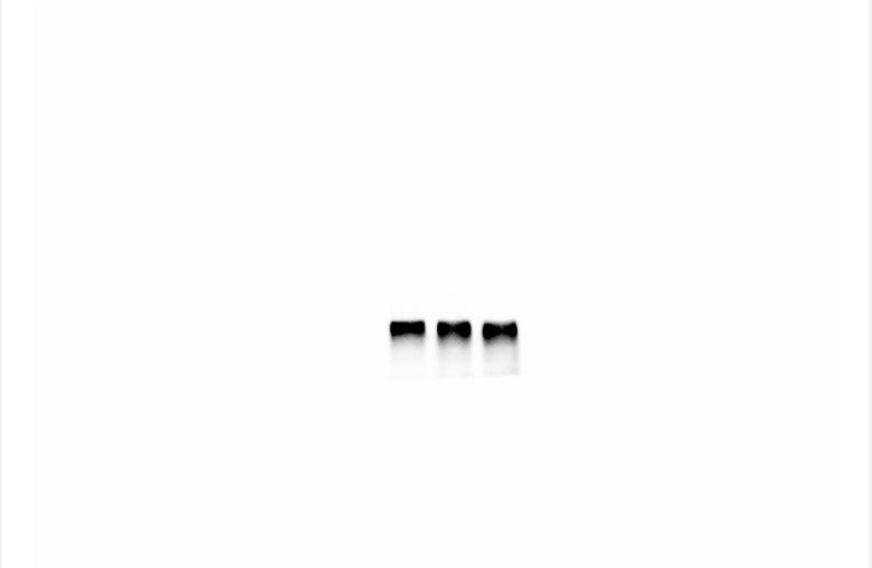

Lapatinib

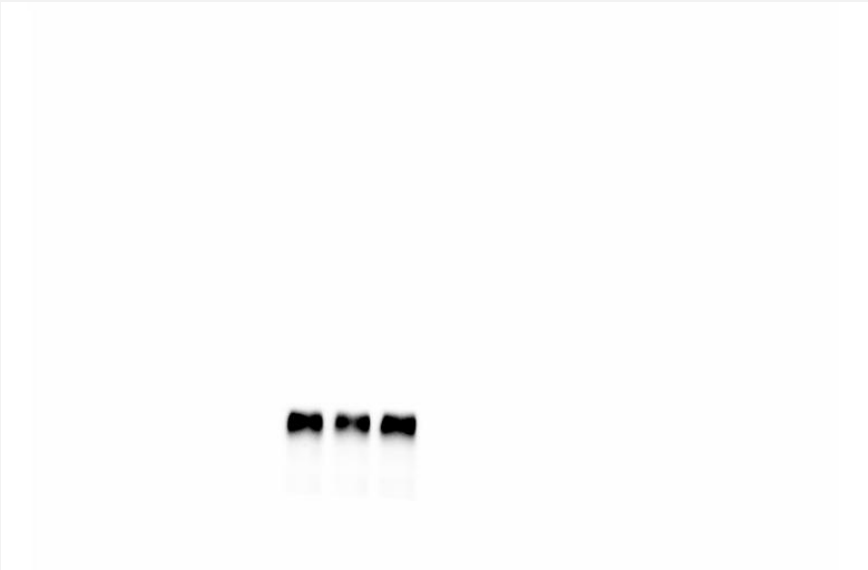

Palbociclib

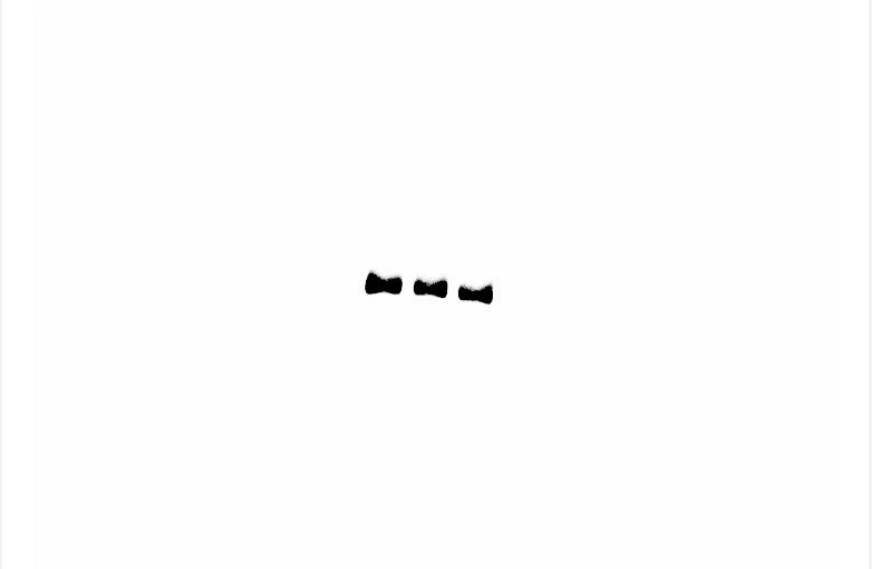

Lap+Pal

p-HER2

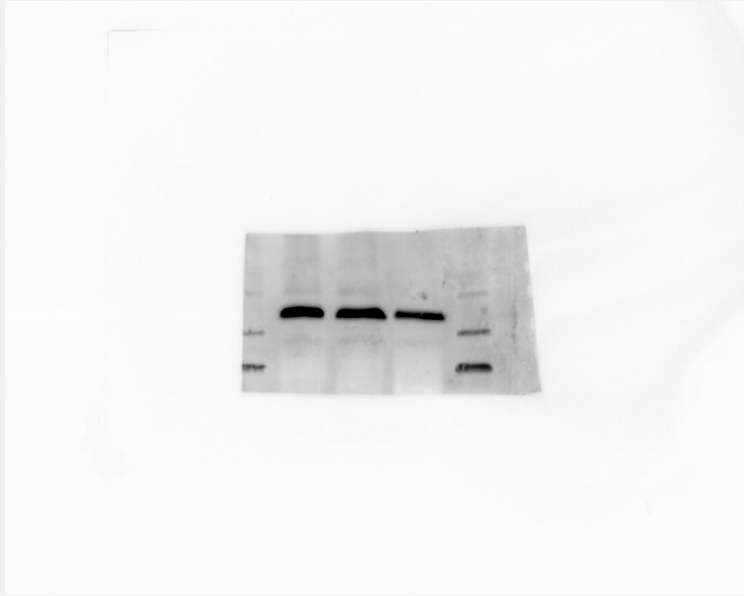

control

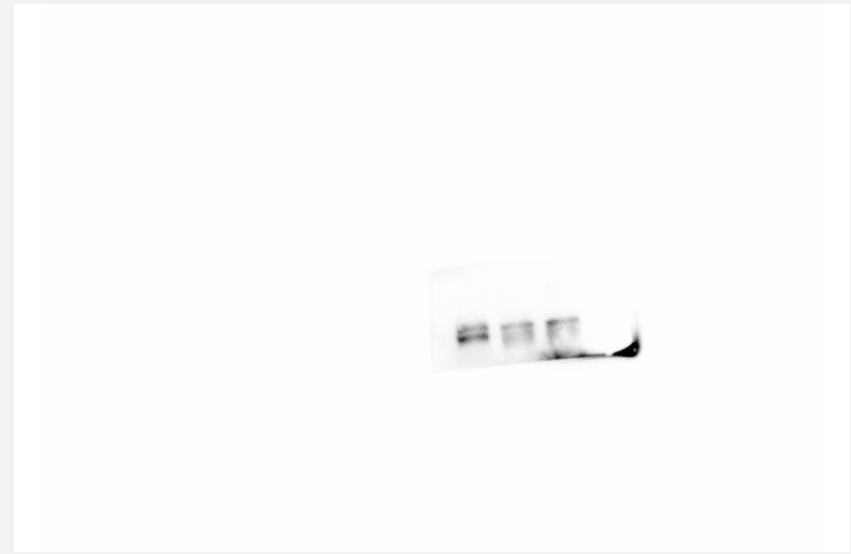

Lapatinib

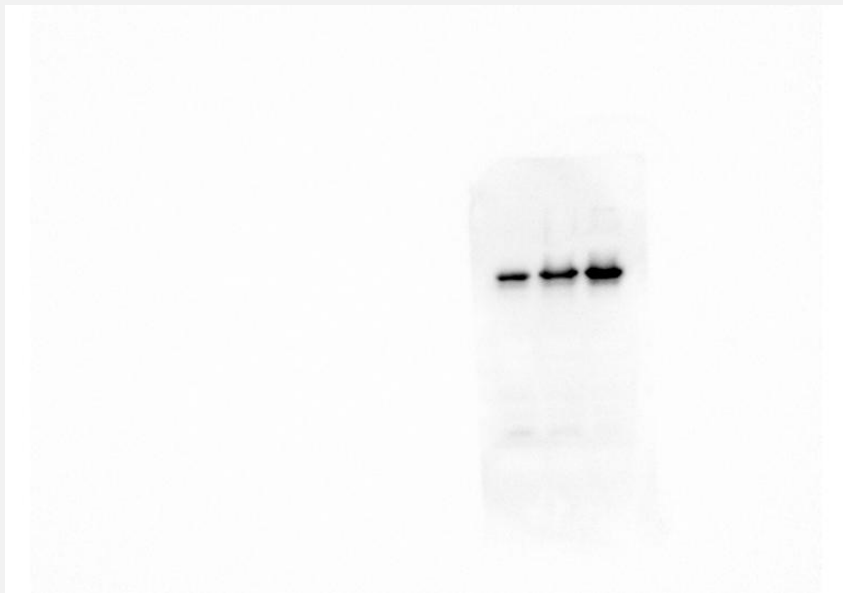

Palbociclib

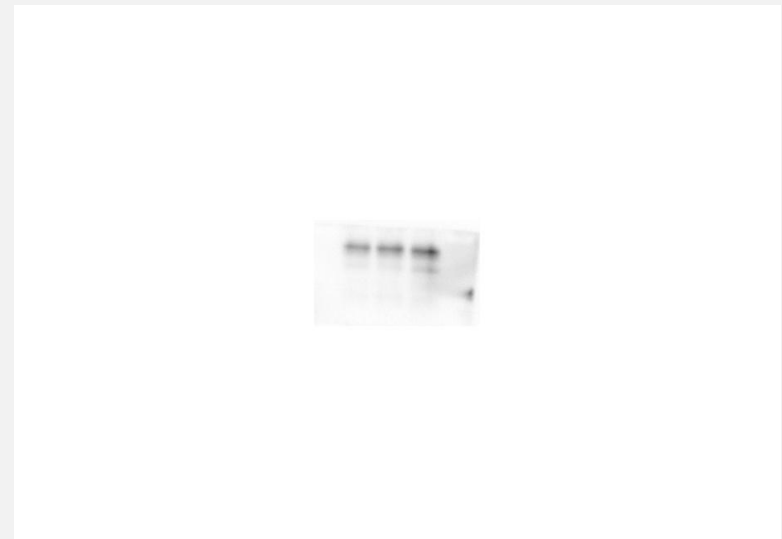

Lap+Pal



EGFR

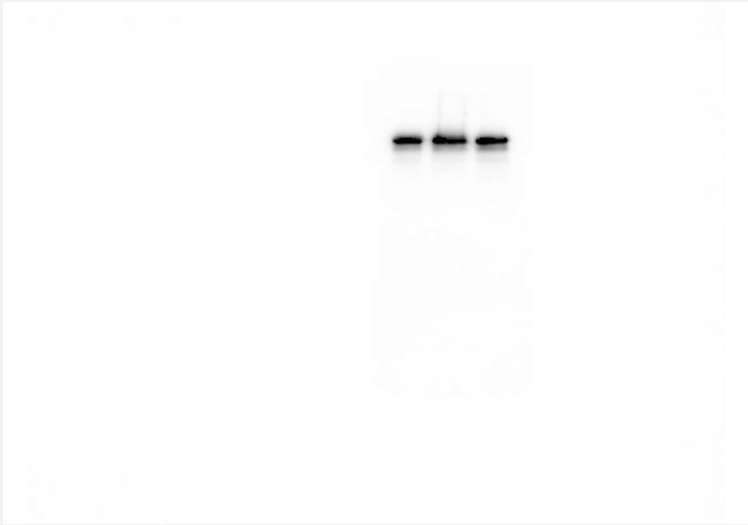

control

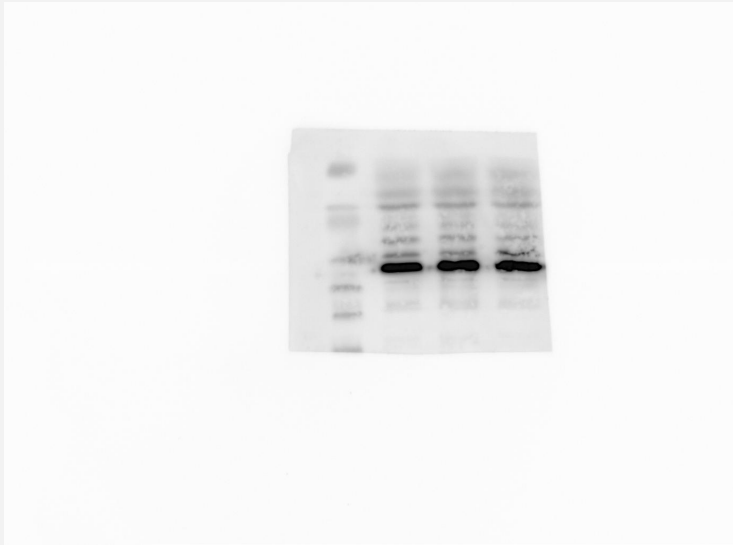

Lapatinib

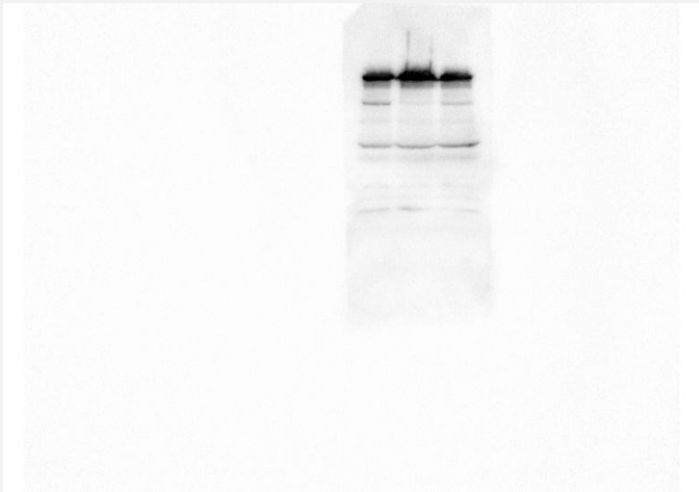

Palbociclib

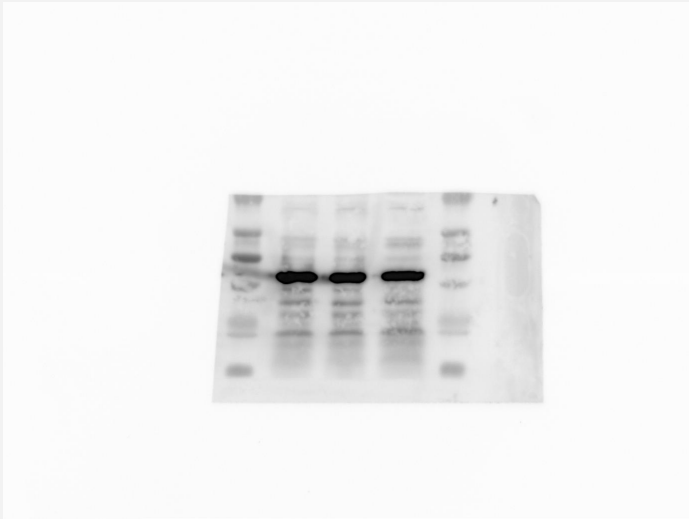

Lap+Pal

p-EGFR

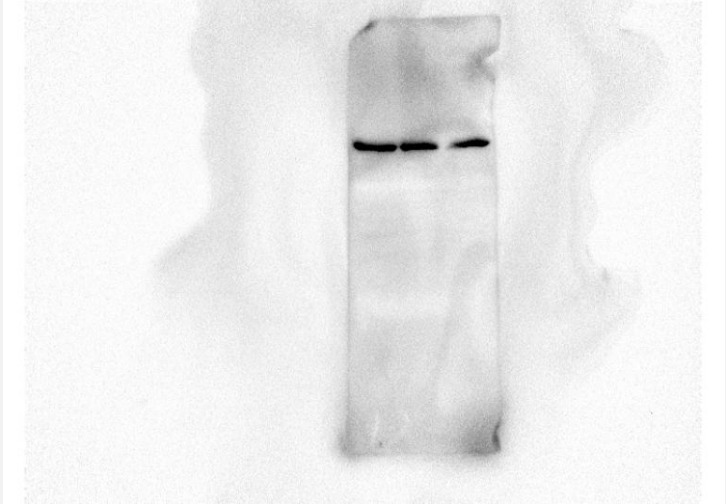

control

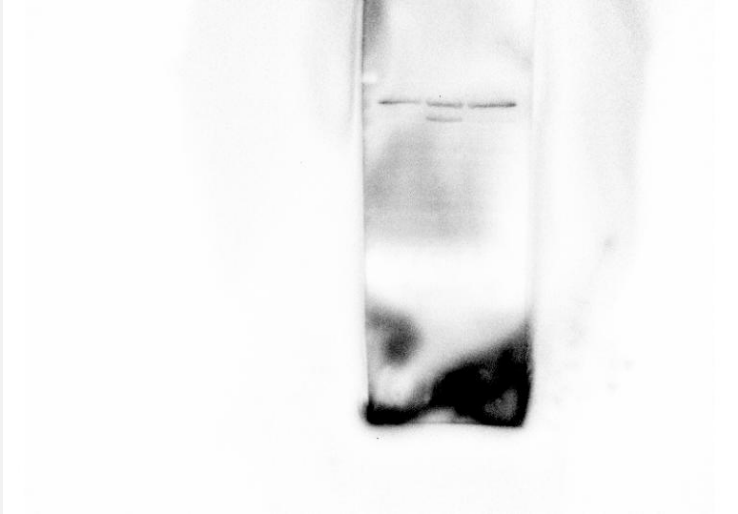

Lapatinib

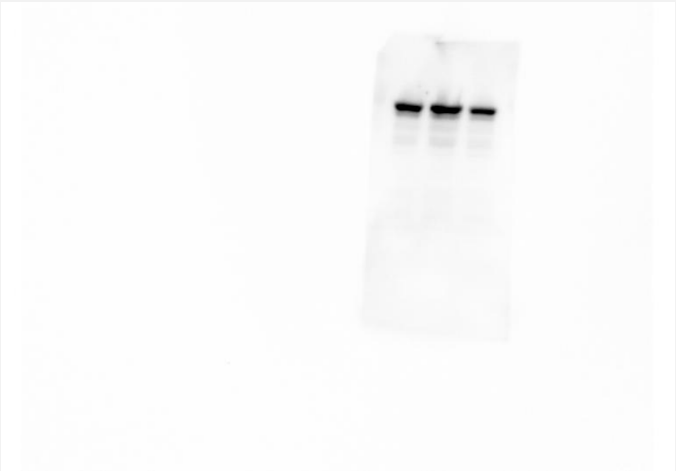

Palbociclib

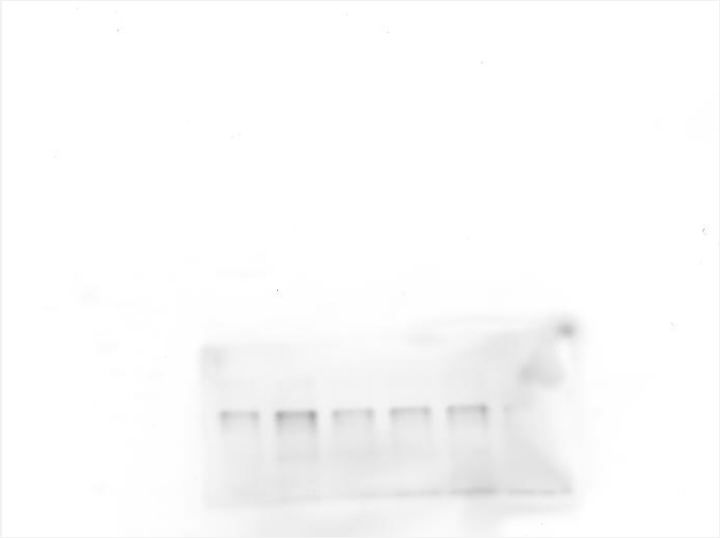

Lap+Pal

TSC2

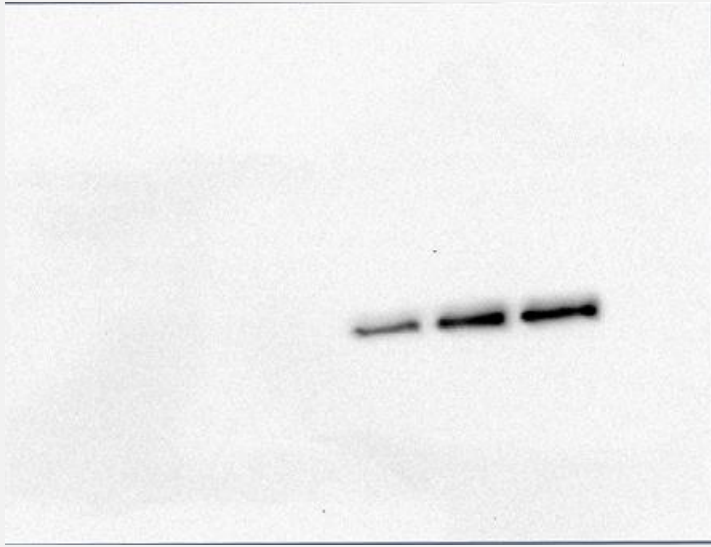

control

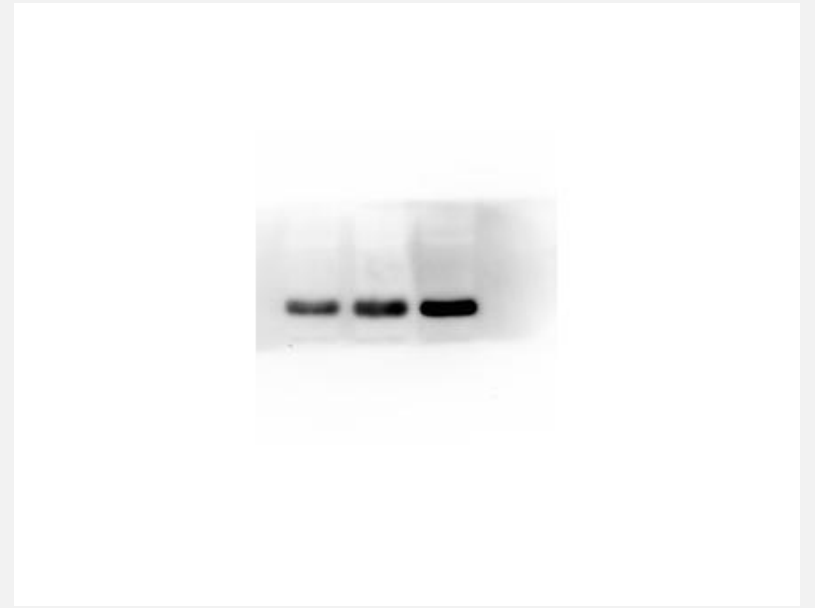

Lapatinib

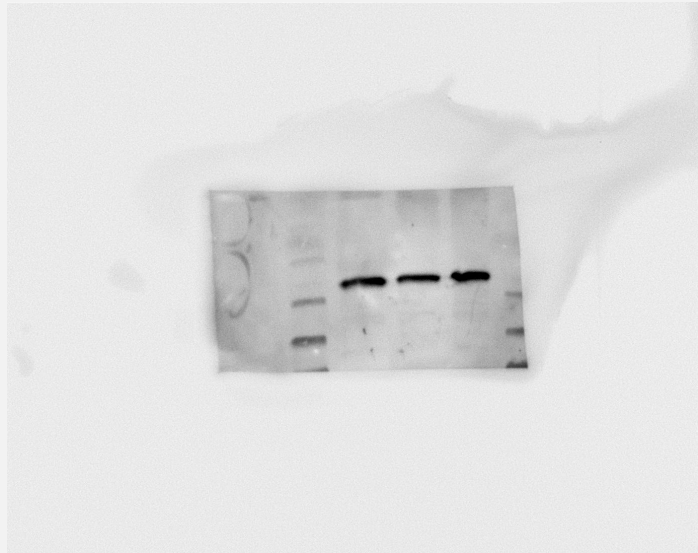

Palbociclib

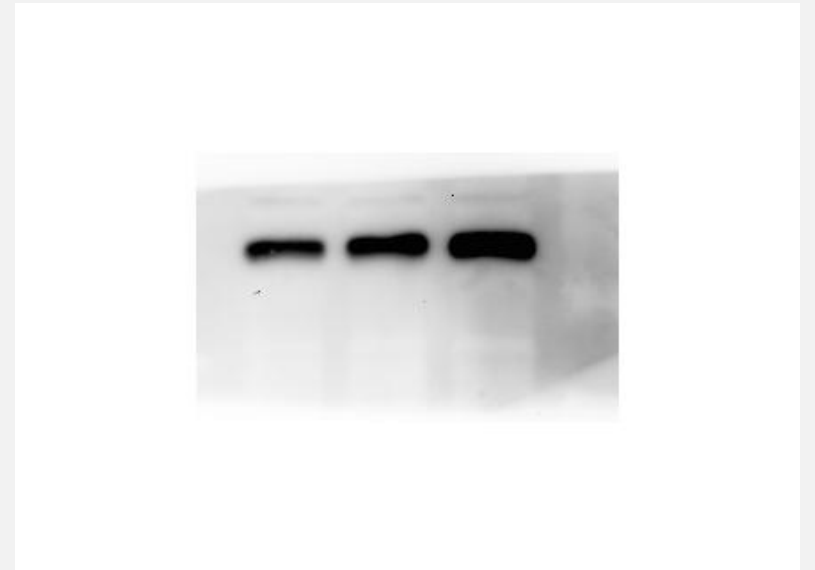

Lap+Pal

p-TSC2

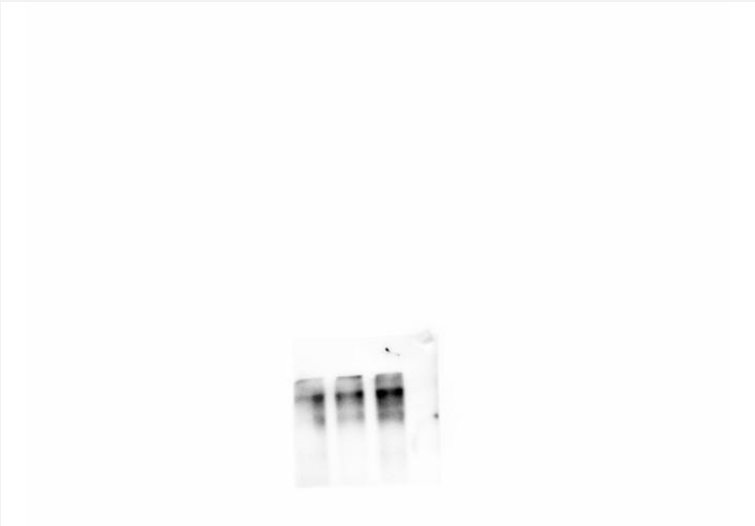

control

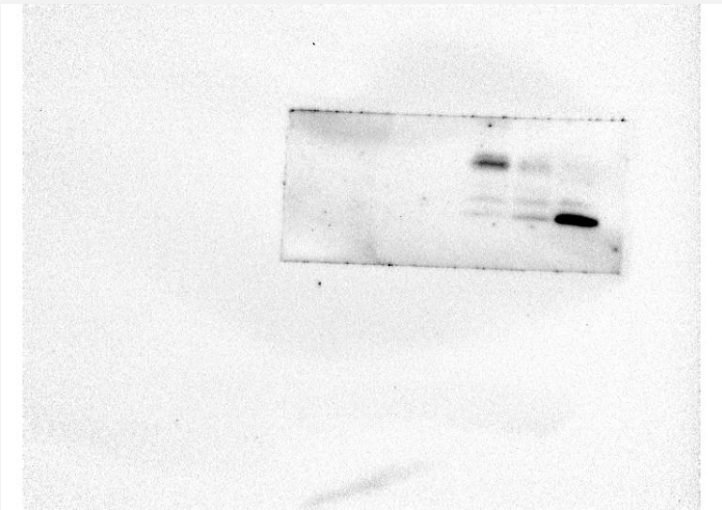

Lapatinib

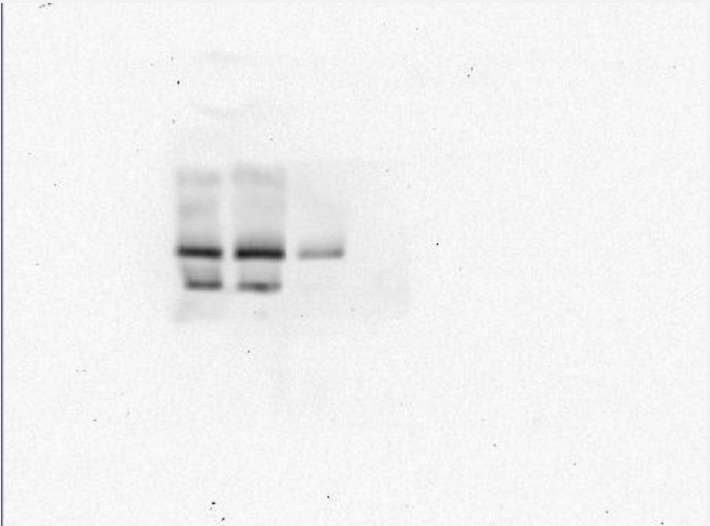

Palbociclib

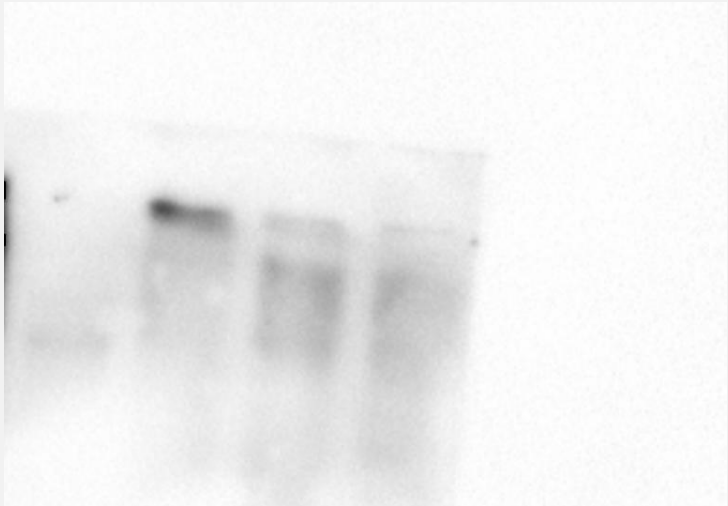

Lap+Pal

mTOR

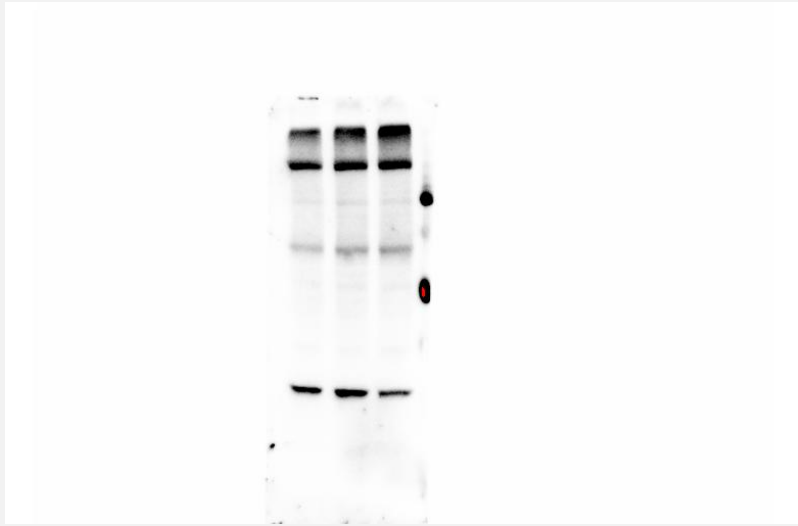

control

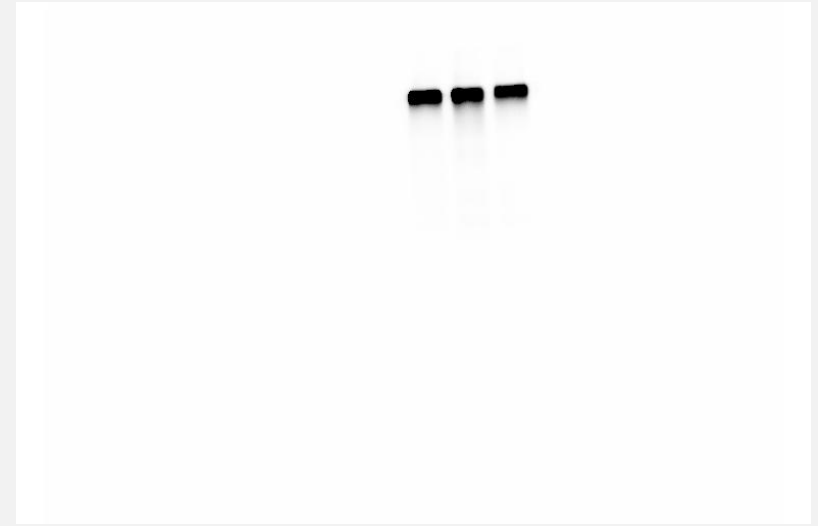

Lapatinib

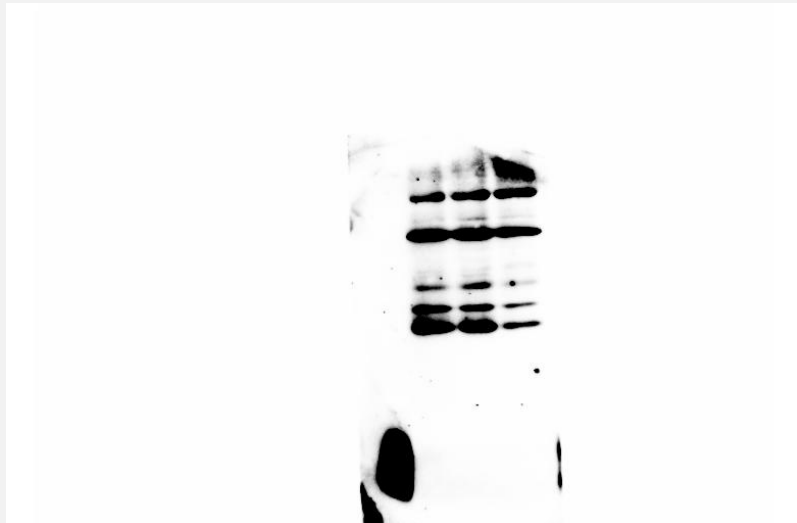

Palbociclib

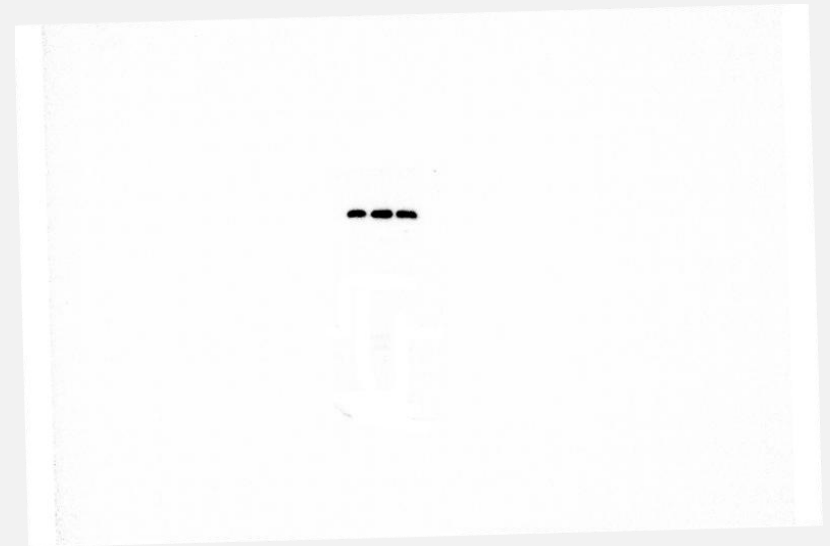

Lap+Pal

p-mTOR

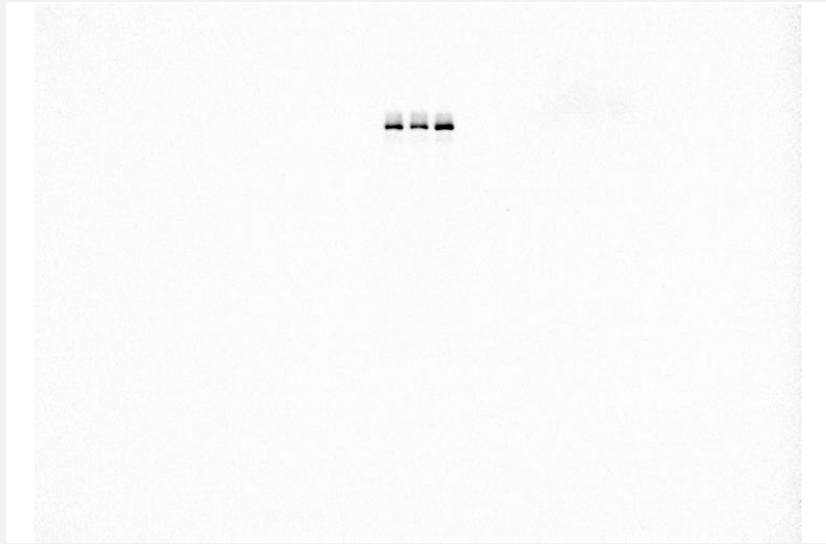

control

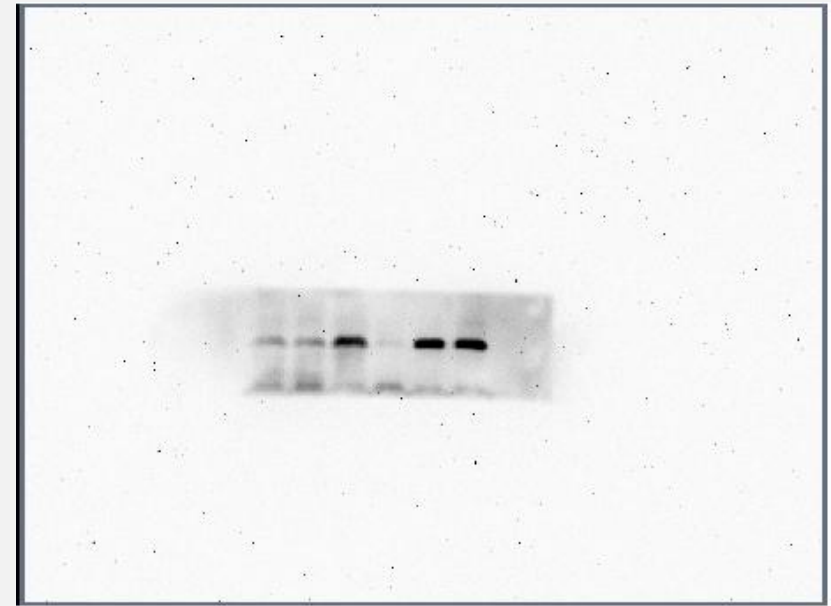

Lapatinib

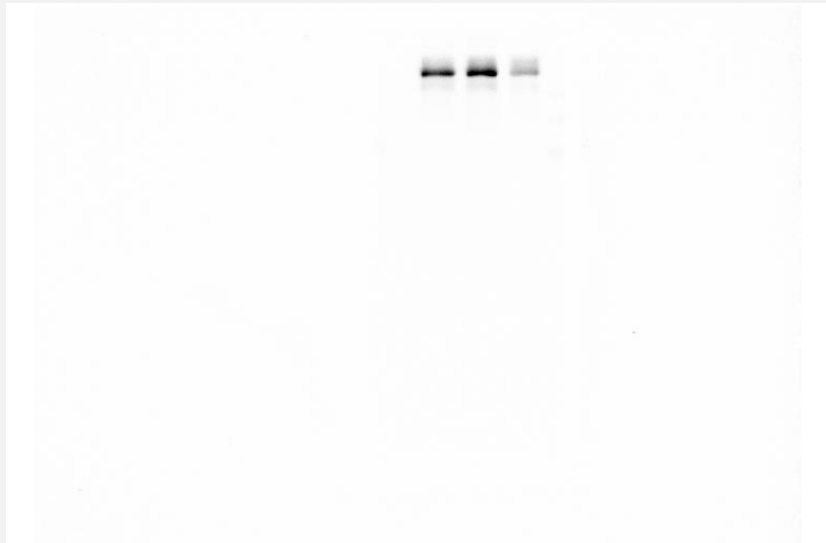

Palbociclib

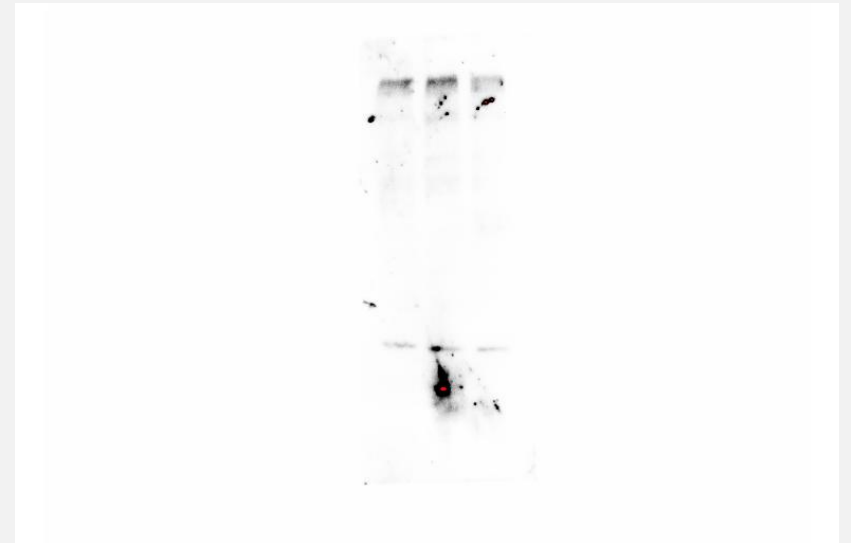

Lap+Pal

P70S6K

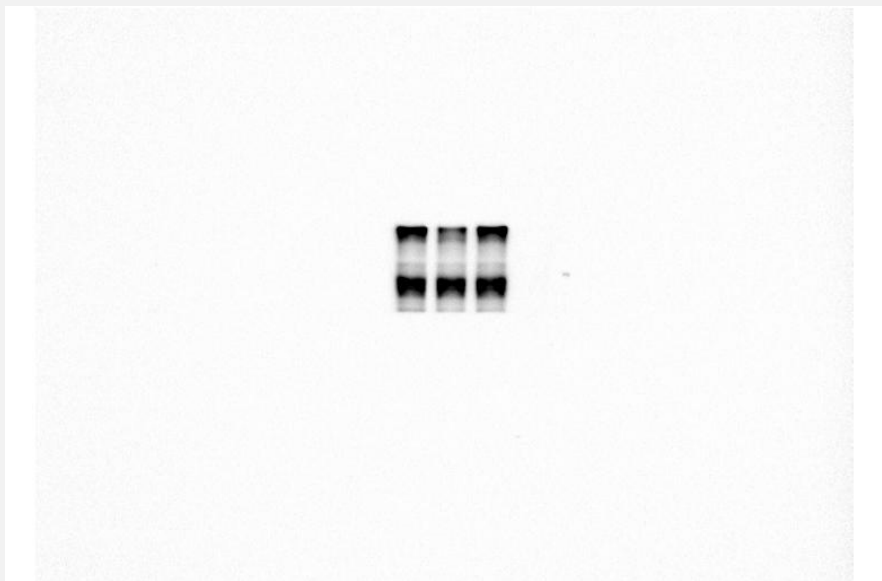

control

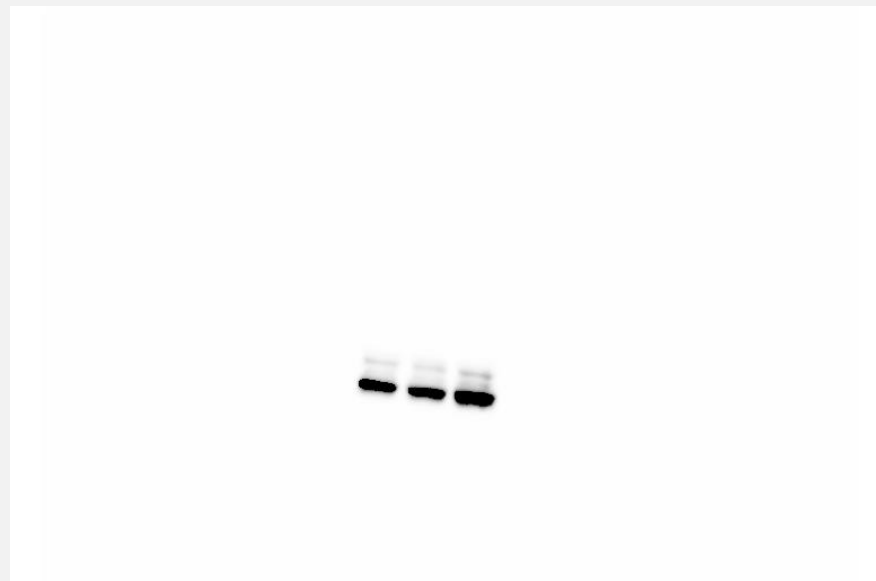

Lapatinib

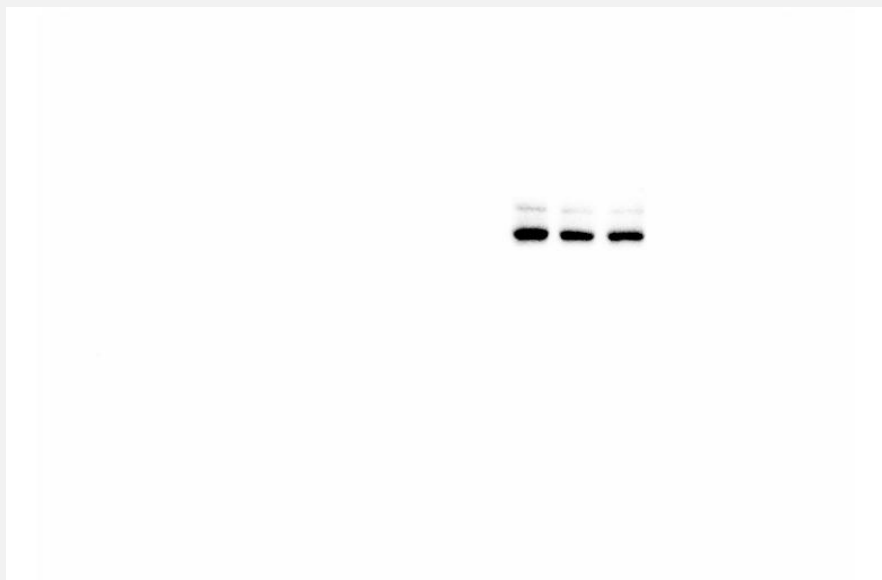

Palbociclib

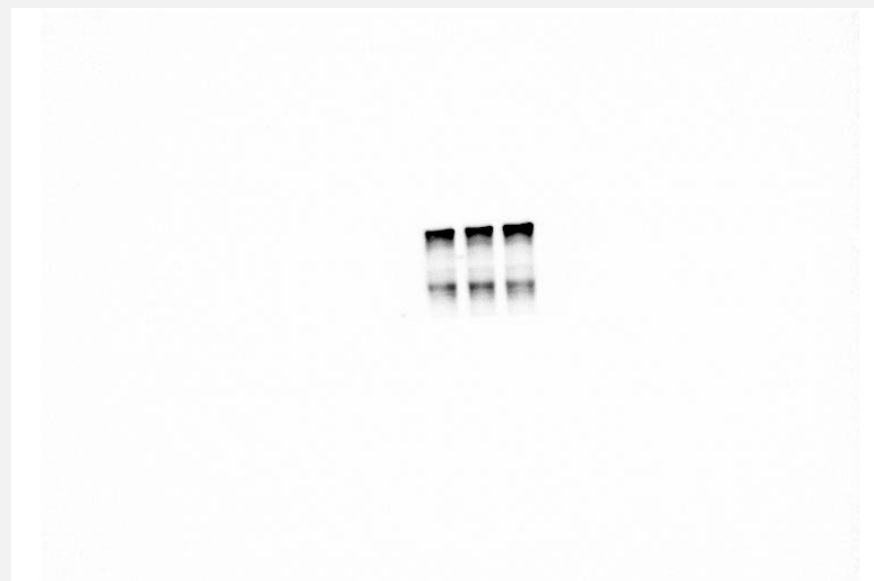

Lap+Pal

p-P70S6K

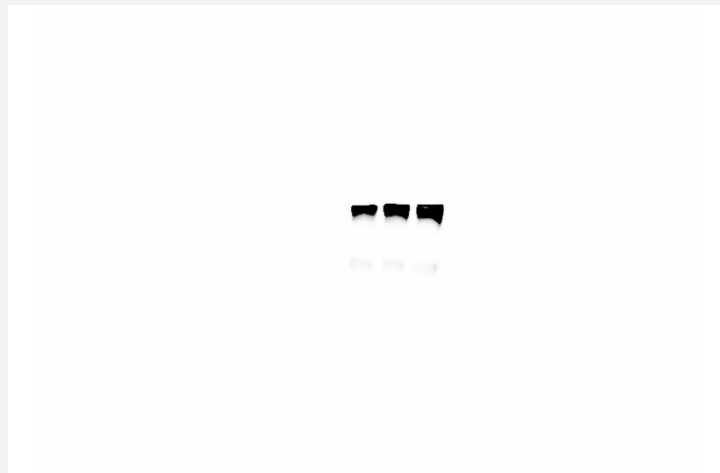

control

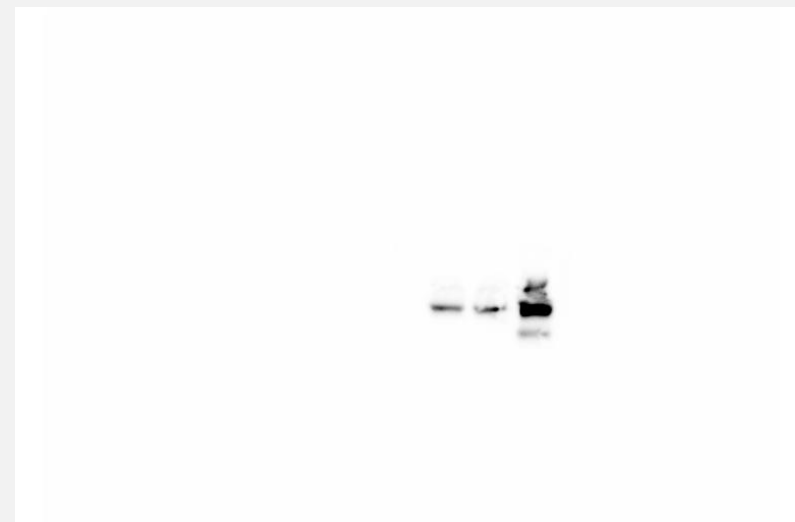

Lapatinib

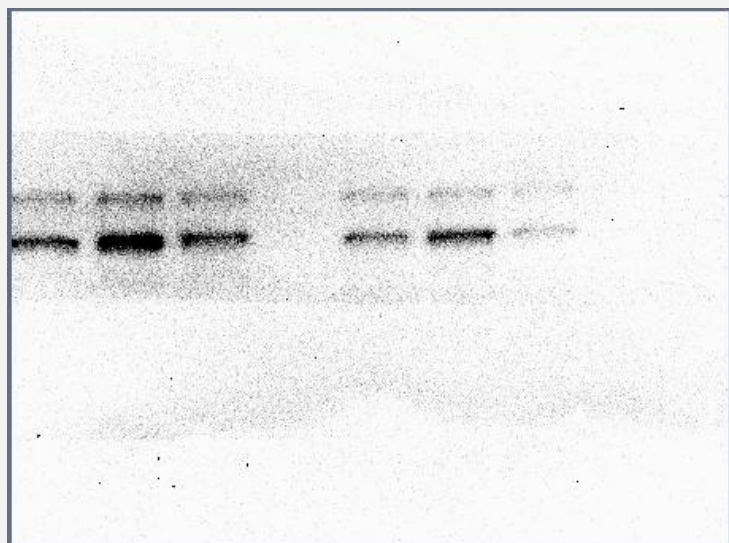

Palbociclib

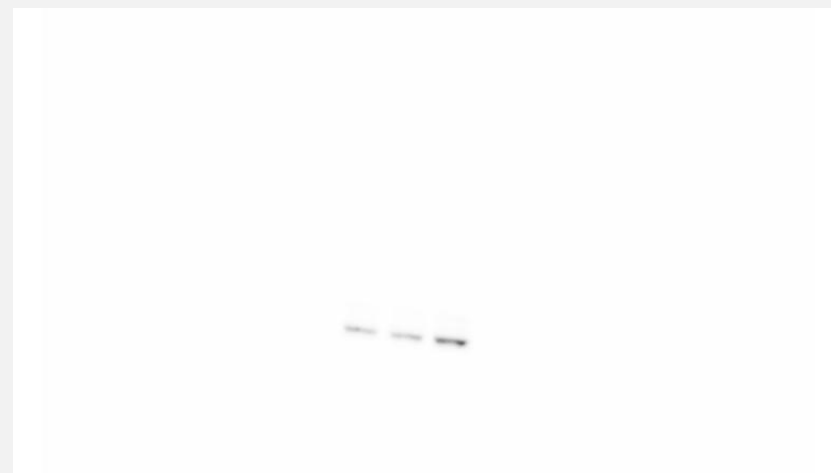

Lap+Pal



CDK4

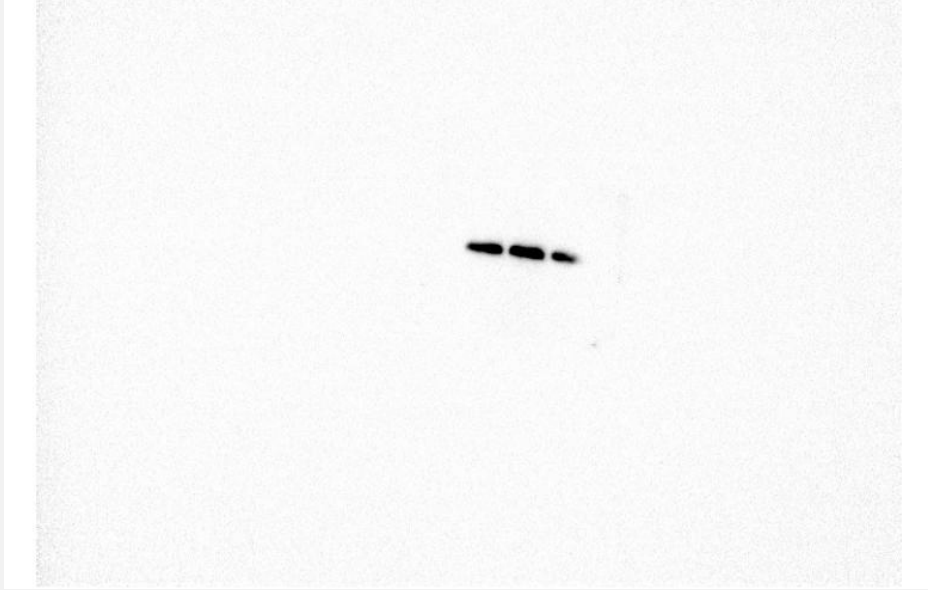

control

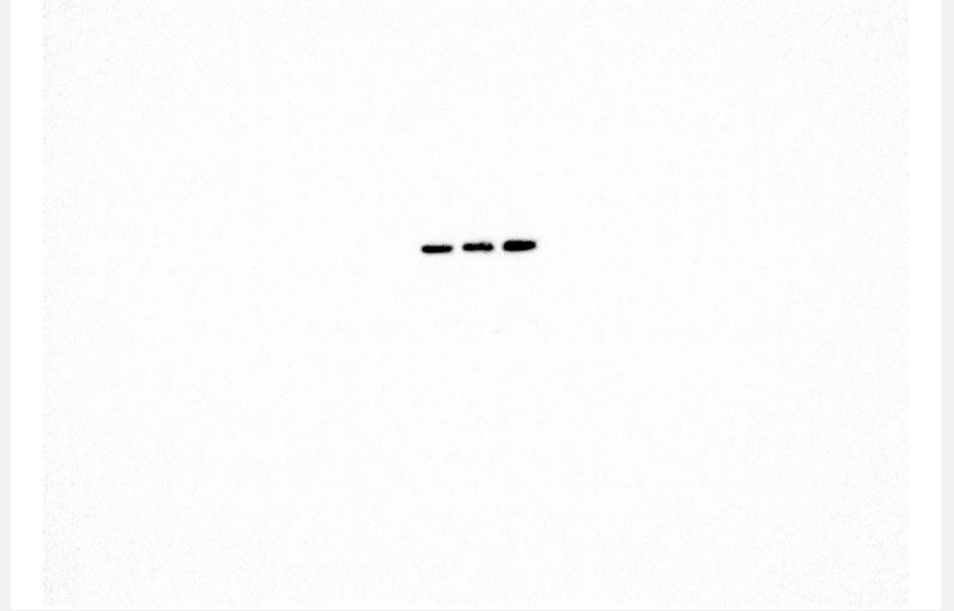

Lapatinib

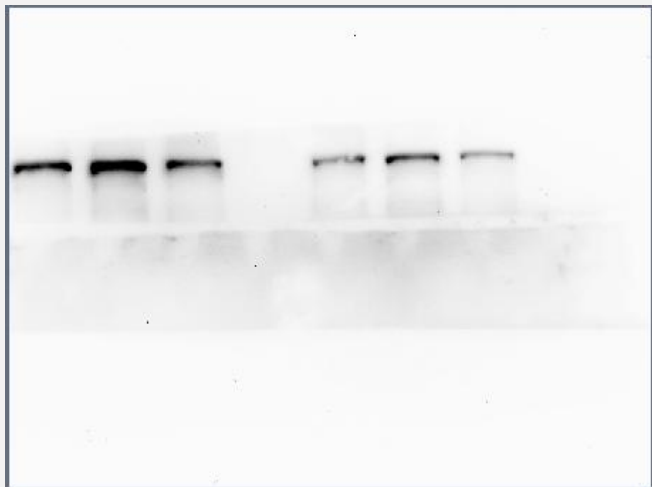

Palbociclib

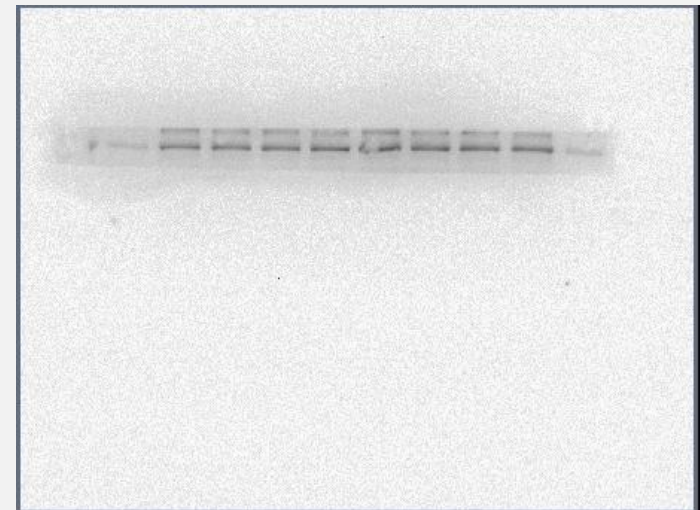

Lap+Pal

RB

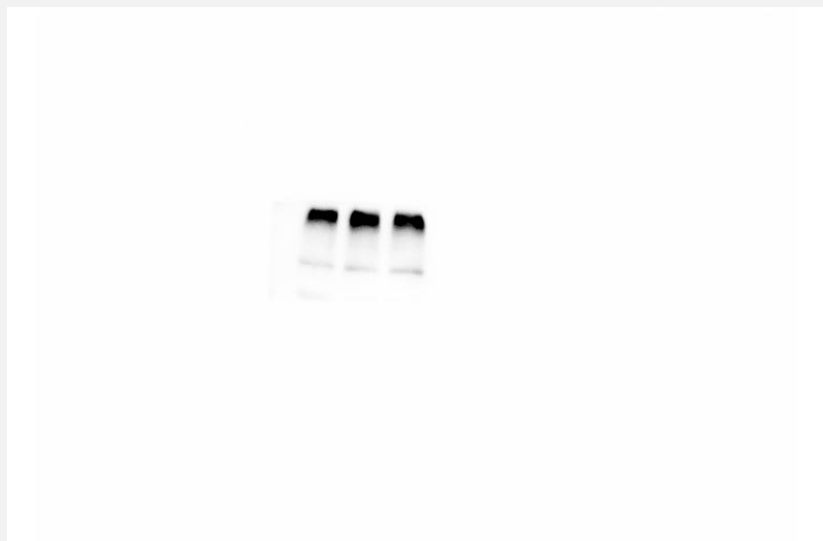

control

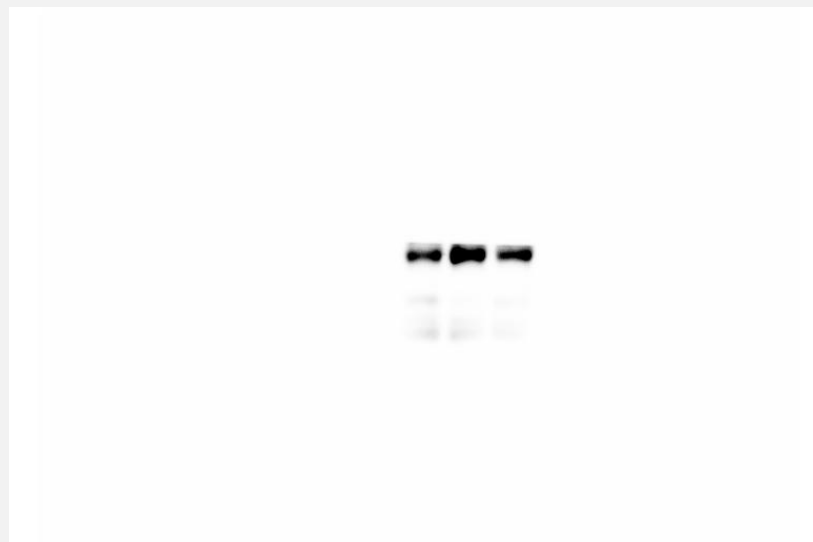

Lapatinib

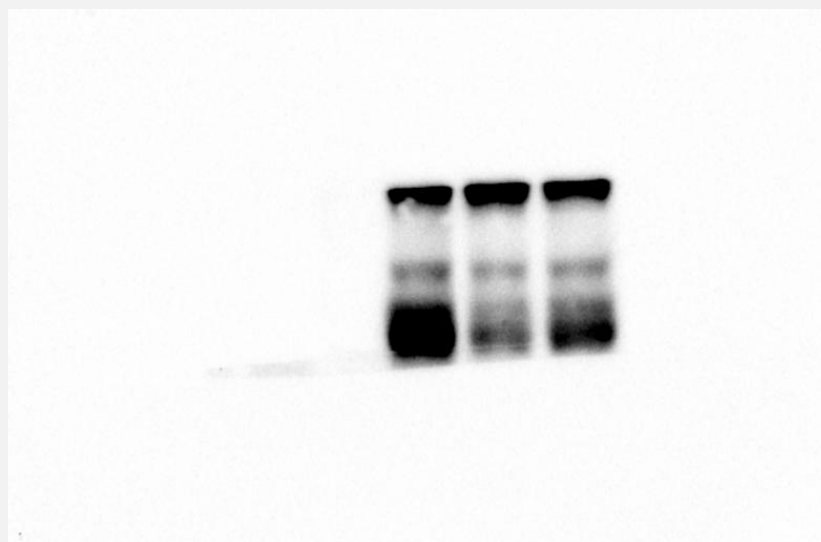

Palbociclib

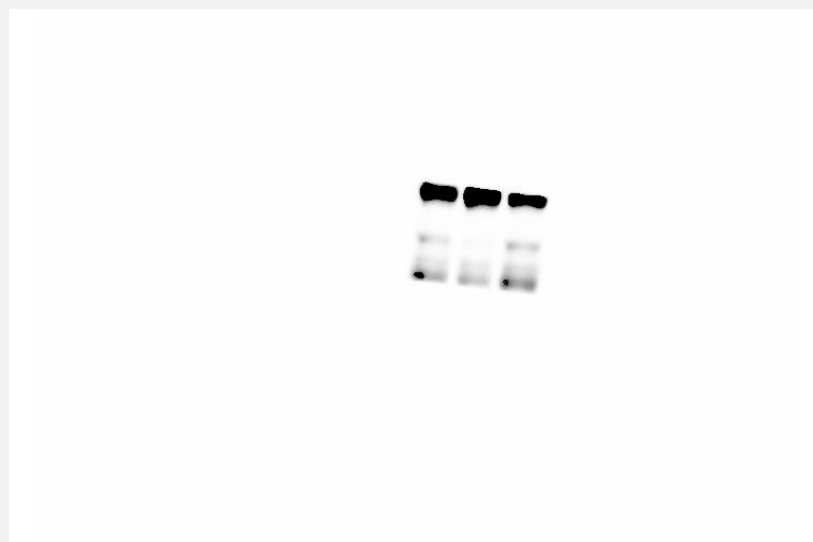

Lap+Pal

p-RB

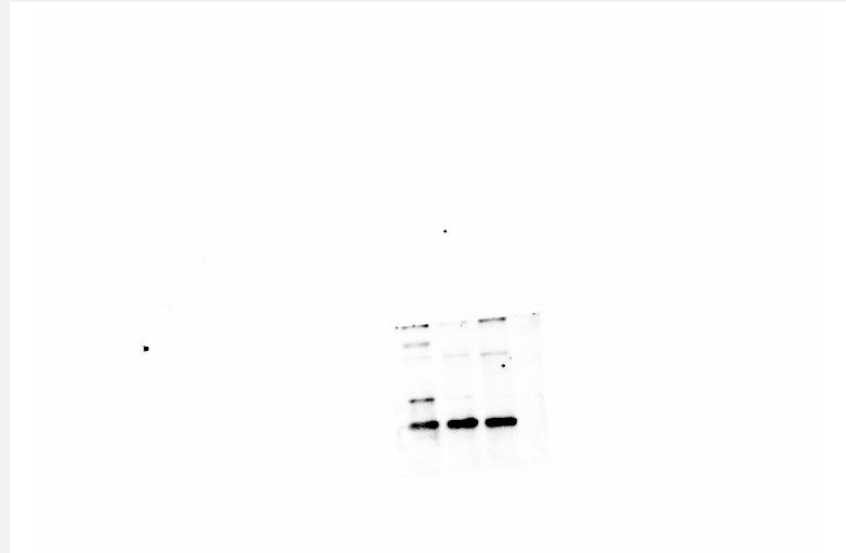

control

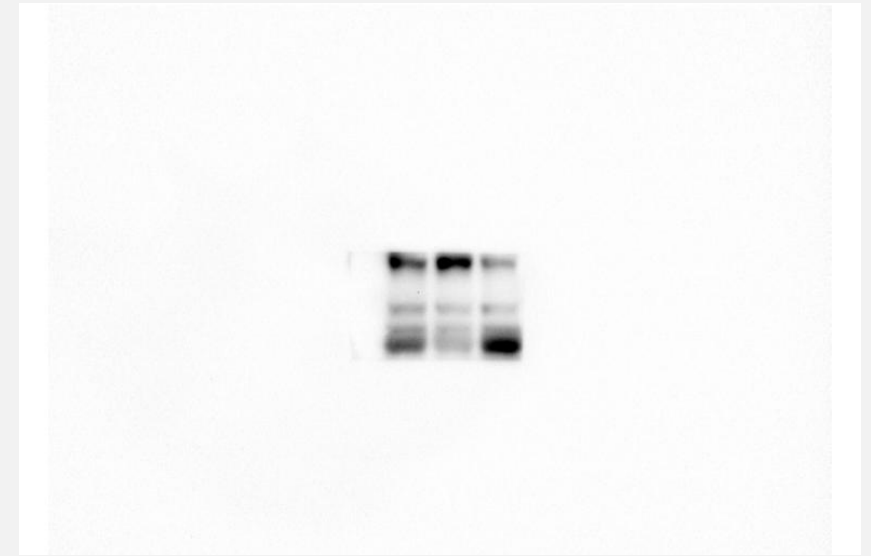

Lapatinib

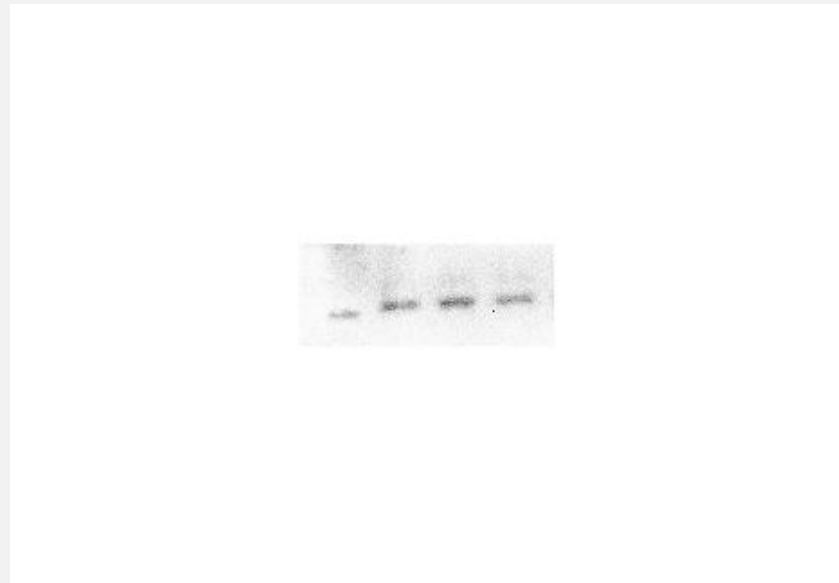

Palbociclib

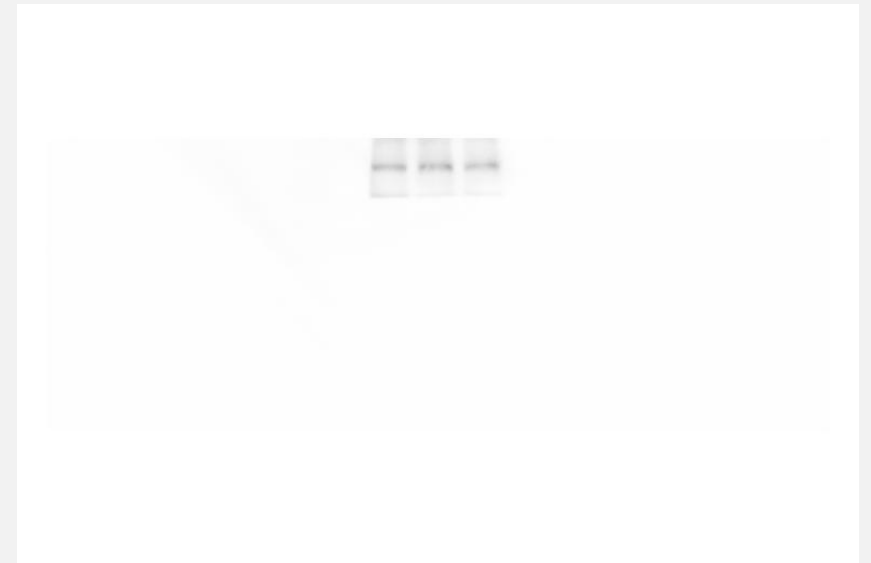

Lap+Pal

Actin

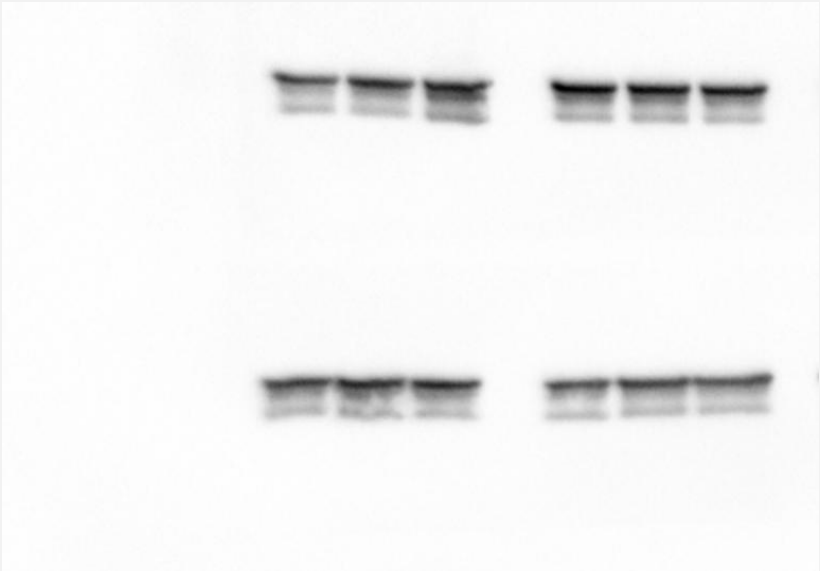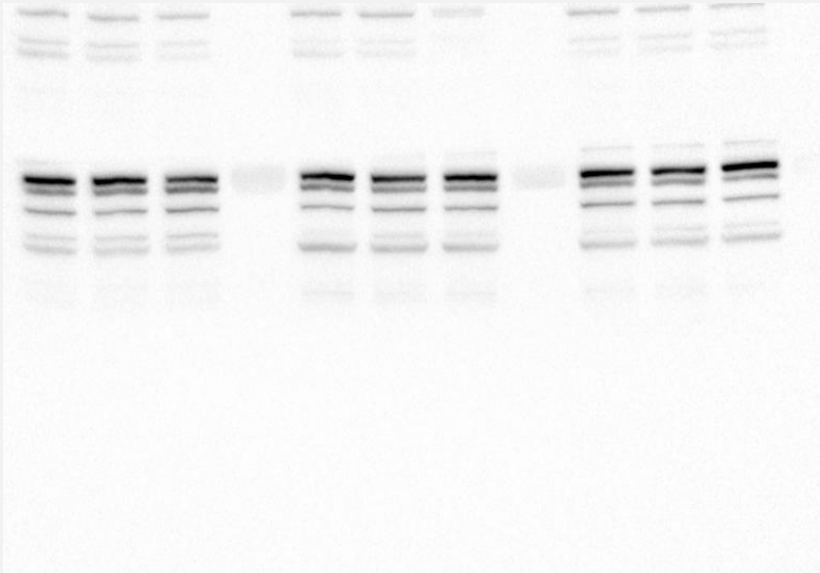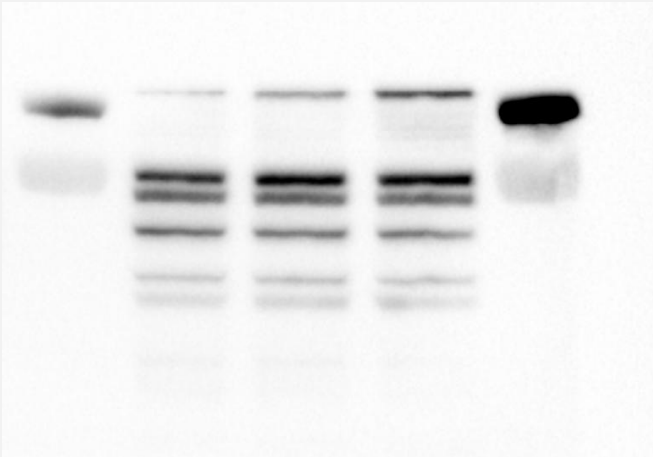

Supplement: 41523_2023_542_MOESM1_ESM.pdf [file 41523_2023_542_MOESM1_ESM.pdf]
